# Supplementary material for: Pure hydrocarbon host materials based on spirofluorene with excellent performances for green phosphorescent light-emitting devices
Source: Royal Society of Chemistry journal article supplement (doi:10.1039/c6nj01872f), 2016-01-01
Supplement: c6nj01872f1.pdf [file c6nj01872f1.pdf]

Pure hydrocarbon host materials based on spirofluorene with  
excellent performances for green phosphorescent light-emitting  
devices

Guojian Tian,<sup>a</sup> YongXin Jiang,<sup>b</sup> Panpan Wu,<sup>a</sup> Jinhai Huang,<sup>a</sup> Qi Zou,<sup>c</sup> Qiaochun  
Wang,<sup>a</sup> Haichuan Mu<sup>\*b</sup> and Jianhua Su<sup>\*a</sup>

*<sup>a</sup>Key Laboratory for Advanced Materials and Institute of Fine Chemicals,  
East China University of Science and Technology, Shanghai 200237, PR  
China. E-mail: bbsjh@ecust.edu.cn.*

*<sup>b</sup>Department of Physics, School of Science, East China University of  
Science and Technology, 130 Meilong Road, Shanghai 200237, PR China.*

*<sup>c</sup>Shanghai Key Laboratory of Materials Protection and Advanced Materi  
als in Electric Power, Shanghai University of Electric Power, Shanghai 2  
00090, PR China.*

Fig. S1-S12. The <sup>1</sup>H NMR, <sup>13</sup>C NMR and MALDI-TOF spectra of  
compounds 1-4.

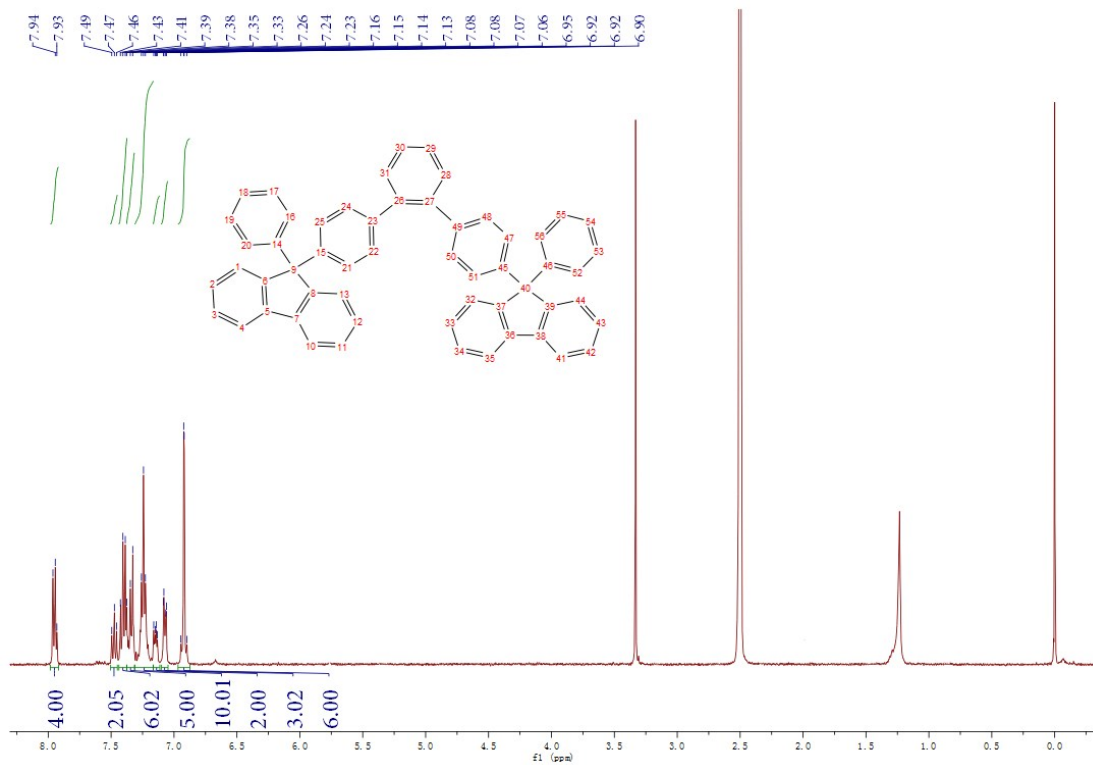

Fig.S1. The  $^1\text{H}$  NMR spectra of 1.

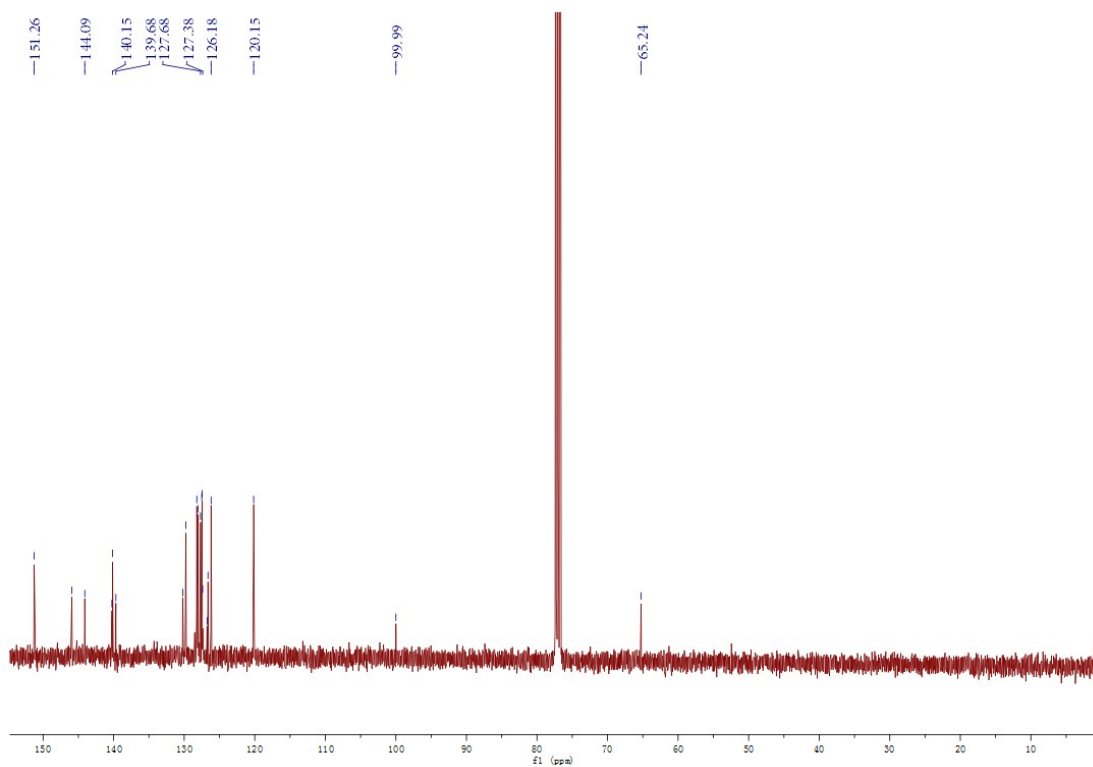

Fig.S2. The  $^{13}\text{C}$  NMR spectra of 1.

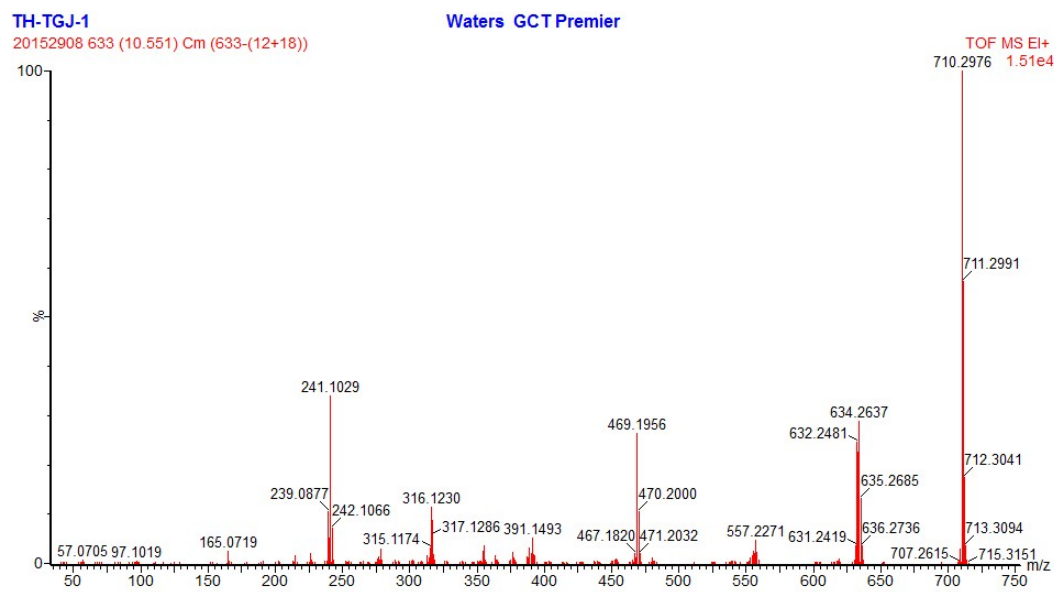

Fig.S3. The MALDI-TOF spectra of 1.

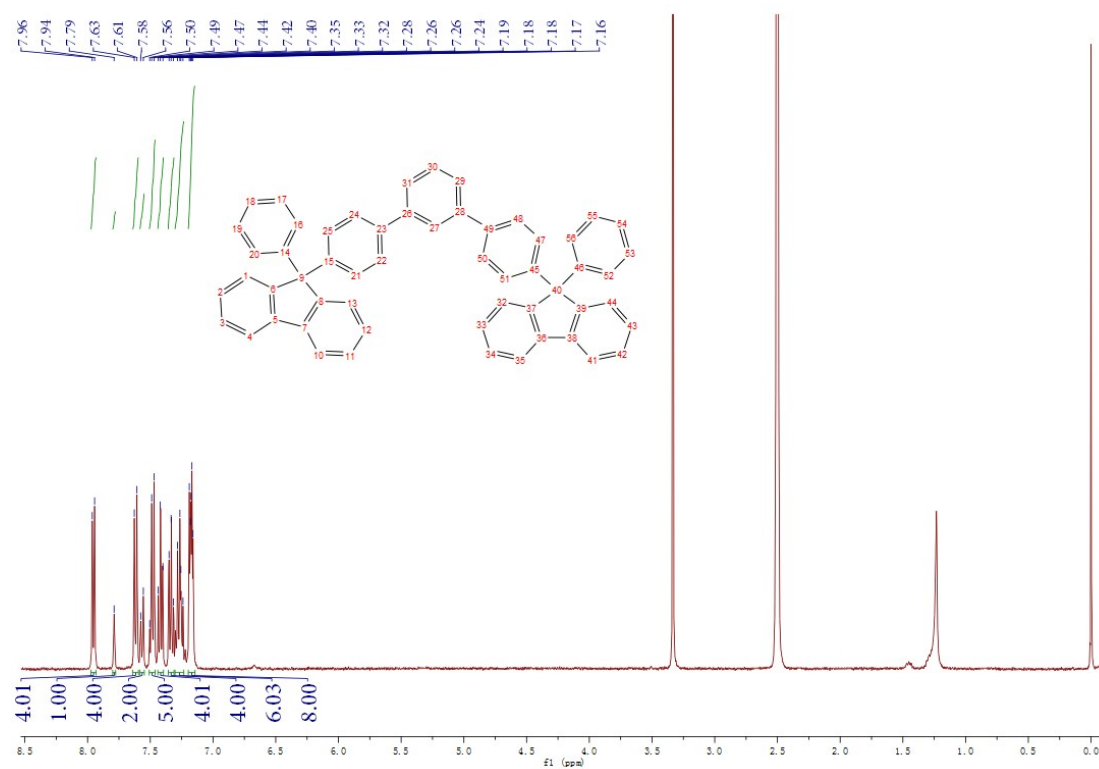

Fig.S4. The  $^1\text{H}$  NMR spectra of 2.

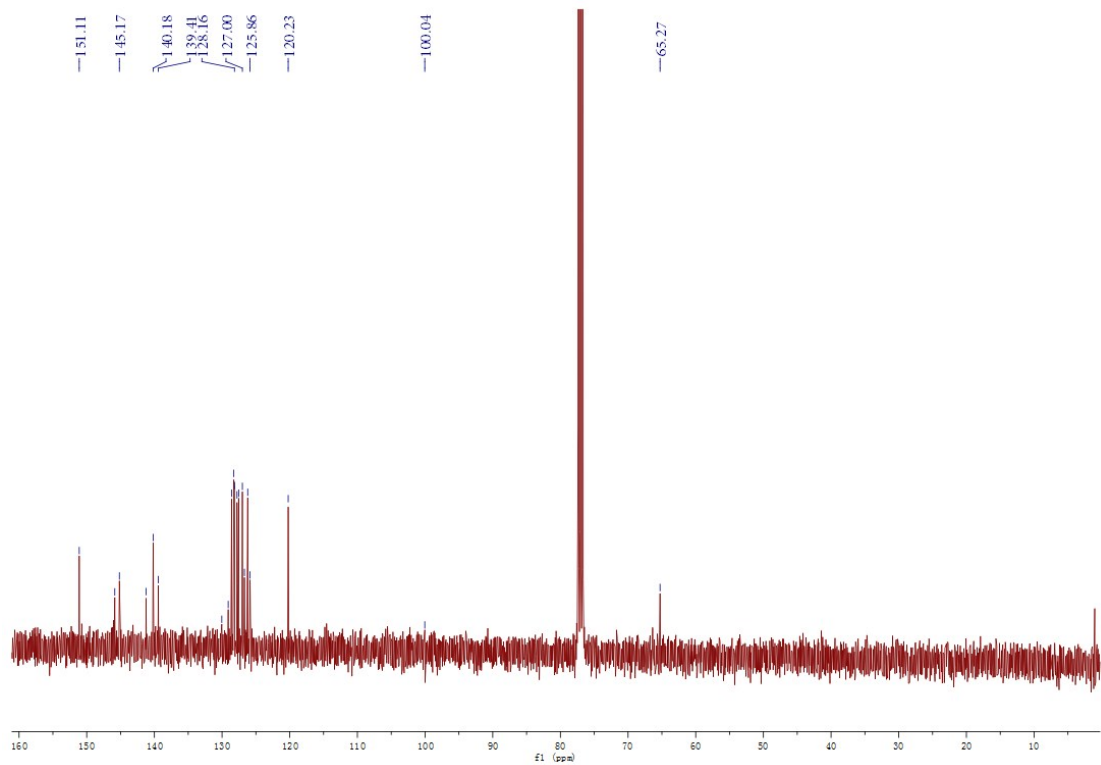

Fig.S5. The  $^{13}\text{C}$  NMR spectra of 2.

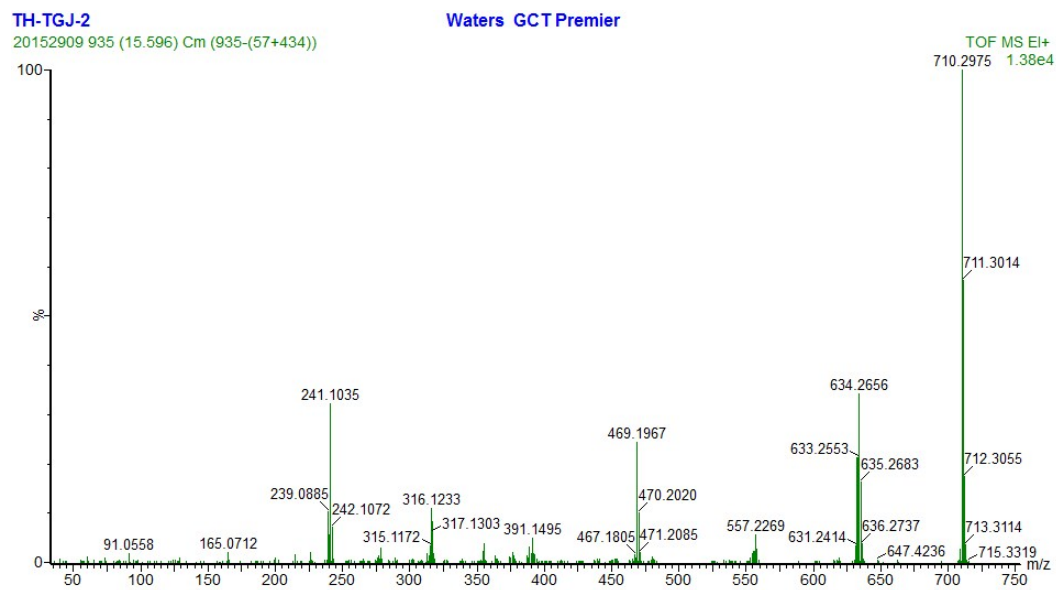

Fig.S6. The MALDI-TOF spectra of 2.

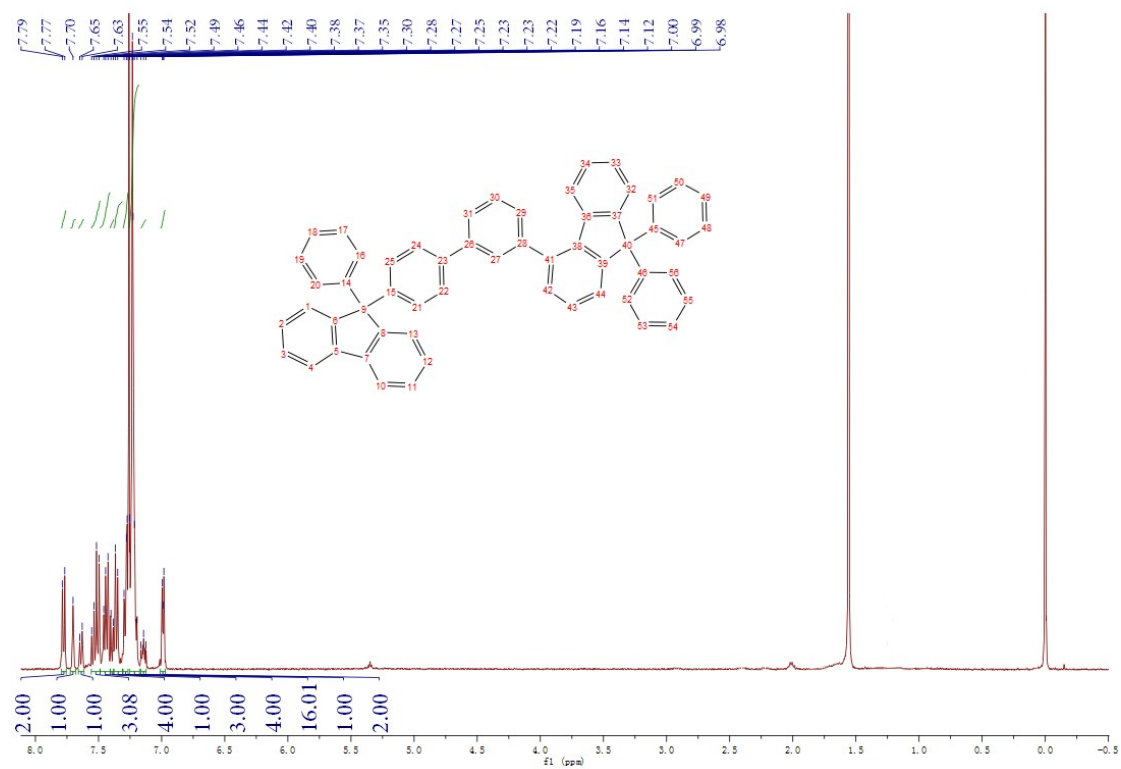

Fig.S7. The <sup>1</sup>H NMR spectra of 3.

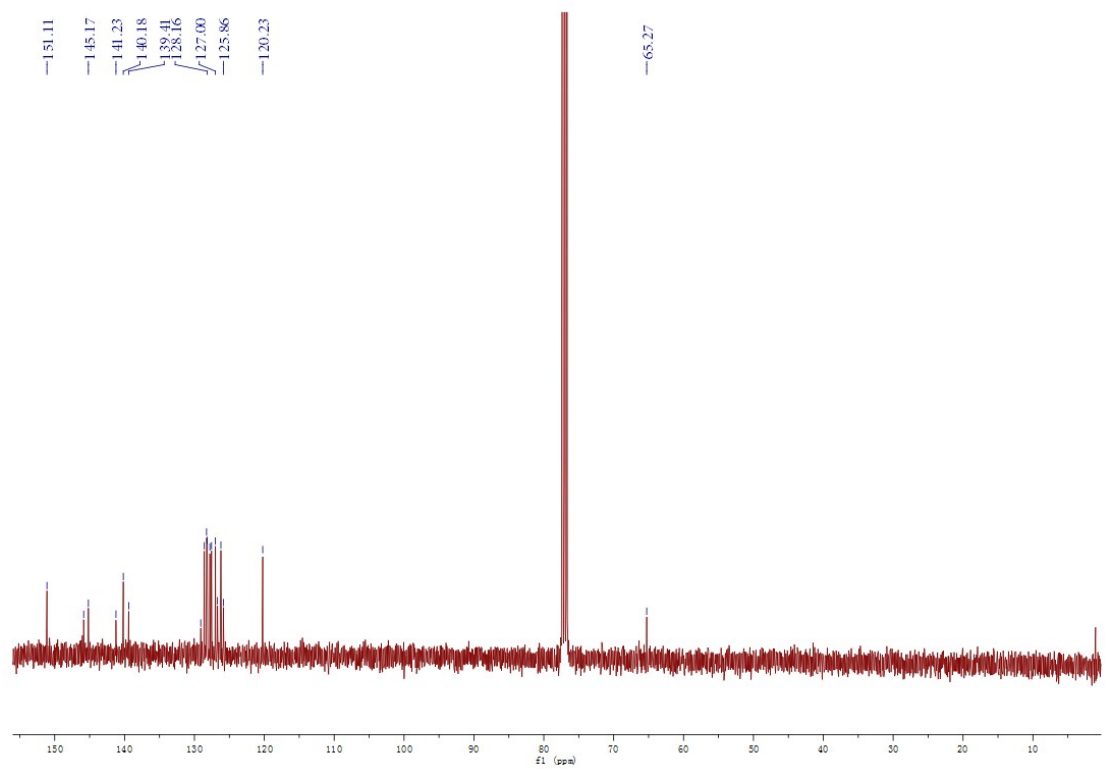

Fig.S8. The <sup>13</sup>C NMR spectra of 3.

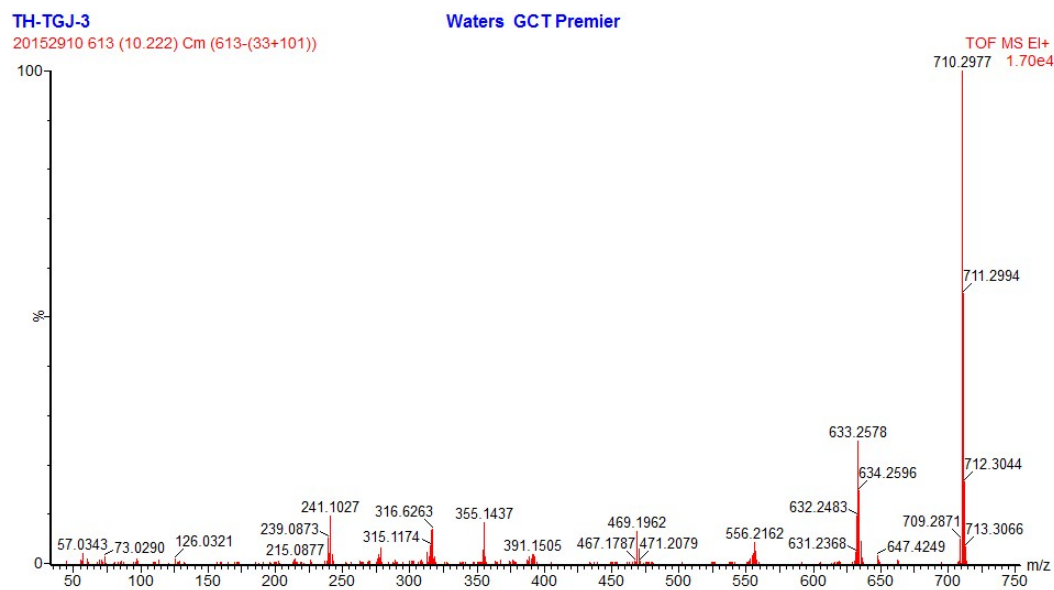

Fig.S9. The MALDI-TOF spectra of 3.

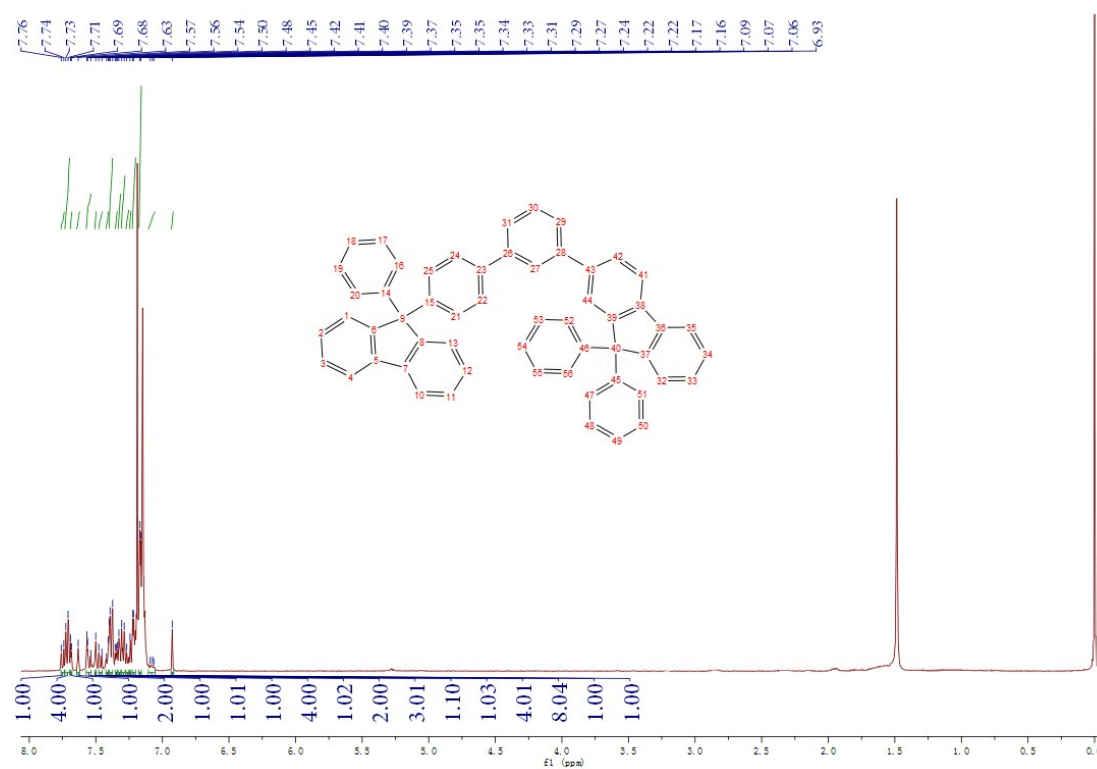

Fig.S10. The <sup>1</sup>H NMR spectra of 4.

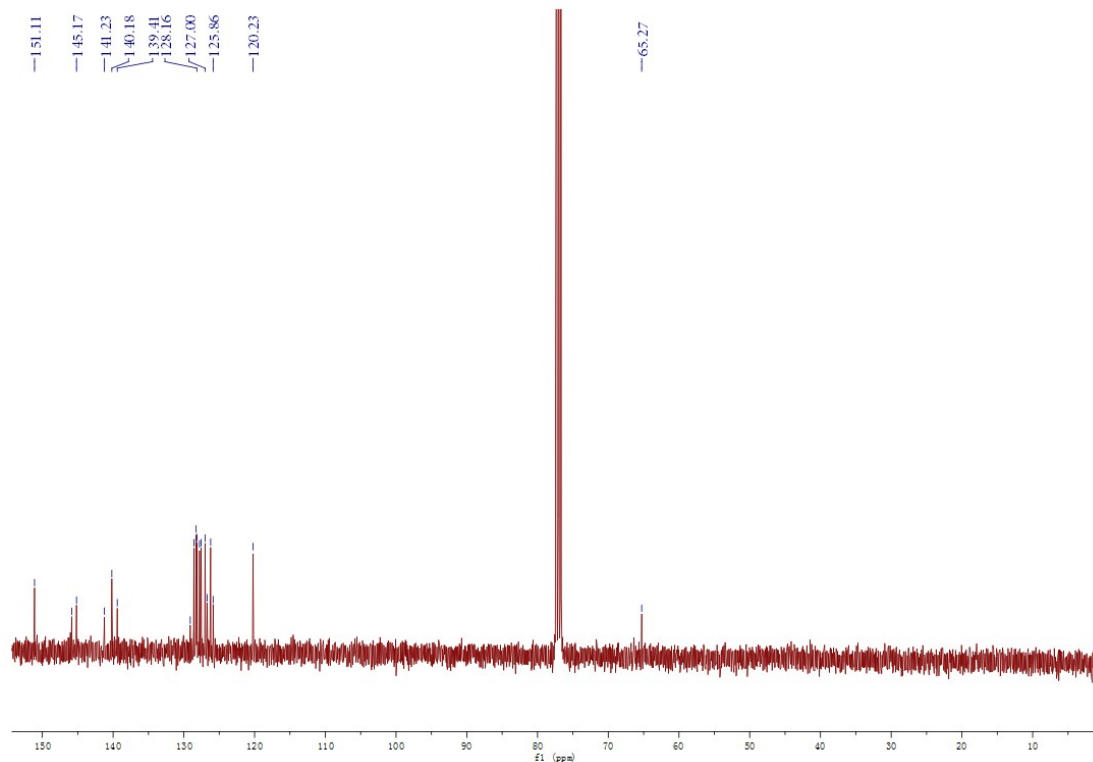

Fig.S11. The  $^{13}\text{C}$  NMR spectra of 4.

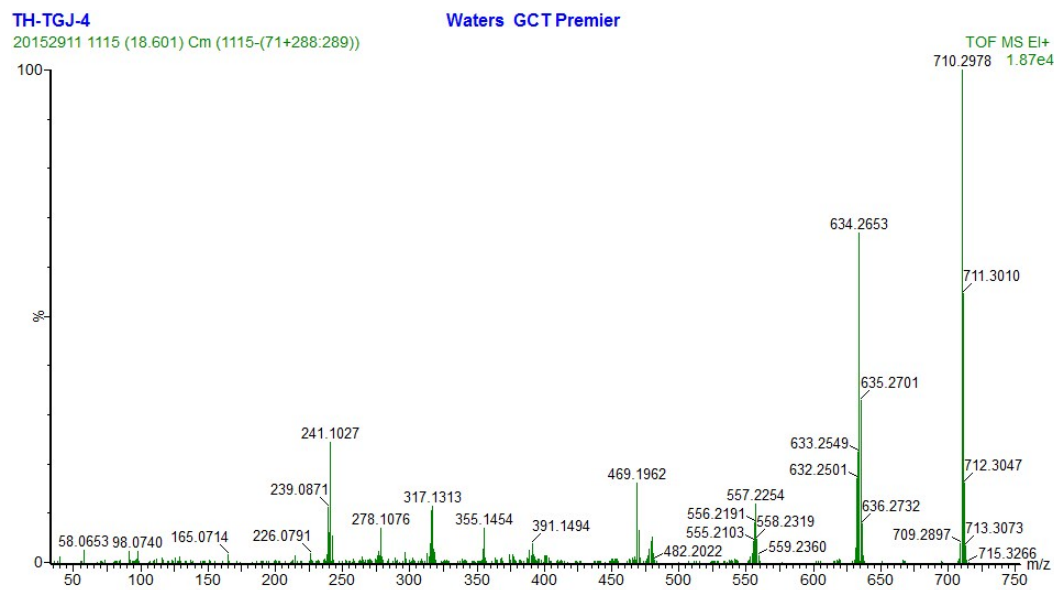

Fig.S12. The MALDI-TOF spectra of 4.
